# Supplementary material for: Fecal Microbiome Modulation of Bacterial Communities Associated With the Administration of Probiotic Lactic Acid Bacteria to Feedlot Cattle
Source: Research Square preprint supplement (doi:10.21203/rs.3.rs-1098858/v1), 2021-12-09
Supplement: Supplementary file 2 [file 09452bc005faccc1a5ca638b.xlsx]

## Sheet: Picrust2_MetaCyc
#NAME-	pathway description	CONTROL	A_E-40	B_E-40	C_E-40	D_E-40	E_E-40	A_E-104	B_E-104	C_E-104	D_E-104	E_E-104	A_E-163	B_E-163	C_E-163	D_E-163	E_E-163
PWY-7220	adenosine deoxyribonucleotides de novo biosynthesis II	91365	102924	88963	99275	91398	90136	108783	100058	118360	100596	97029	106344	99178	96353	102073	92215
PWY-7222	guanosine deoxyribonucleotides de novo biosynthesis II	91365	102924	88963	99275	91398	90136	108783	100058	118360	100596	97029	106344	99178	96353	102073	92215
PWY-621	sucrose degradation III (sucrose invertase)	88860	98762	86170	98022	85897	83509	111484	107559	122357	101379	93605	104450	92864	95488	106796	82845
PWY-6609	adenine and adenosine salvage III	86624	98416	84063	91526	87438	87092	100875	92808	110163	94529	92702	100958	94683	88754	93203	90663
NONOXIPENT-PWY	pentose phosphate pathway (non-oxidative branch)	82497	89626	77892	84039	79192	80613	95289	93231	103981	91813	85488	93857	85465	82237	90108	77994
PWY-5100	pyruvate fermentation to acetate and lactate II	75298	81338	72335	79951	73240	71434	87721	82430	93672	83565	75853	83641	77545	80197	82458	72421
PWY-5667	CDP-diacylglycerol biosynthesis I	70517	75358	67217	73893	68737	66729	78709	71735	82160	76463	69490	76215	72600	73516	74910	68578
PWY0-1319	CDP-diacylglycerol biosynthesis II	70517	75358	67217	73893	68737	66729	78709	71735	82160	76463	69490	76215	72600	73516	74910	68578
PWY-7229	superpathway of adenosine nucleotides de novo biosynthesis I	70440	75251	66989	73754	68696	66831	78437	71441	81754	76707	69505	76004	72576	73563	74031	68797
PHOSLIPSYN-PWY	superpathway of phospholipid biosynthesis I (bacteria)	68362	72329	64420	70594	66023	64268	75740	69405	78474	75111	66875	73174	69635	71155	71289	66419
ANAGLYCOLYSIS-PWY	glycolysis III (from glucose)	67935	72057	64576	71002	65623	63722	75725	69790	79332	73426	66621	73334	69229	70168	72095	64962
PWY-6126	superpathway of adenosine nucleotides de novo biosynthesis II	67323	71637	63896	70334	65499	63650	74687	67960	77599	73329	66092	72257	69082	70318	70474	65547
PWY0-1296	purine ribonucleosides degradation	66327	76489	64586	72163	68276	68468	78505	69468	85603	71692	73660	78882	74616	69423	70288	72017
GLYCOGENSYNTH-PWY	glycogen biosynthesis I (from ADP-D-Glucose)	65772	70007	63445	69314	64233	62041	72909	65729	76429	69094	63907	71267	67316	68729	69904	63610
PWY4FS-7	phosphatidylglycerol biosynthesis I (plastidic)	65190	68761	61428	67367	62890	61090	72022	65856	74486	71507	63531	69535	66240	67961	67789	63239
PWY4FS-8	phosphatidylglycerol biosynthesis II (non-plastidic)	65190	68761	61428	67367	62890	61090	72022	65856	74486	71507	63531	69535	66240	67961	67789	63239
COMPLETE-ARO-PWY	superpathway of aromatic amino acid biosynthesis	63219	65905	59791	65303	60813	58660	69158	63086	71172	68913	60613	66571	63430	65956	65968	60166
PWY-7219	adenosine ribonucleotides de novo biosynthesis	63073	65933	59465	65190	60790	58793	68706	62444	70591	68527	60509	66199	63584	65697	65050	60472
PWY-7208	superpathway of pyrimidine nucleobases salvage	63000	64681	59257	67055	59507	56008	69427	62256	70490	68367	58698	64576	61461	68089	65974	58051
THRESYN-PWY	superpathway of L-threonine biosynthesis	62551	65192	59086	65831	59904	57497	69573	63590	71302	68462	59808	65776	62964	66422	66053	58802
UDPNAGSYN-PWY	UDP-N-acetyl-D-glucosamine biosynthesis I	62179	67719	59525	66126	60571	59140	71616	65677	75371	69091	62045	68589	64558	66558	66873	61153
P161-PWY	acetylene degradation	61540	65044	55408	63661	57680	58079	68521	62071	70951	69350	61415	65307	61831	65499	60954	60360
PWY-2942	L-lysine biosynthesis III	60293	61237	55661	60897	56890	55148	64582	59299	65403	66257	56714	61661	59082	62664	60535	56295
PWY-6387	UDP-N-acetylmuramoyl-pentapeptide biosynthesis I (meso-diaminopimelate containing)	59855	62926	56539	62188	57850	55963	65718	59410	67693	64996	57829	63288	60641	62653	61872	57672
PWY-5686	UMP biosynthesis	59596	61409	55454	61063	56716	54717	64442	58631	65448	65247	56512	61662	59276	61994	60692	56521
ARO-PWY	chorismate biosynthesis I	59590	61997	56294	61333	57286	55350	64878	59203	66707	64850	57022	62566	59698	61894	61908	56634
NONMEVIPP-PWY	methylerythritol phosphate pathway I	59497	63346	56520	62180	57688	55837	66170	60072	69004	64009	57742	64178	60923	62573	62573	57824
PWY-7560	methylerythritol phosphate pathway II	59497	63346	56520	62180	57688	55837	66170	60072	69004	64009	57742	64178	60923	62573	62573	57824
TRNA-CHARGING-PWY	tRNA charging	59398	63445	56704	62237	58040	56258	65992	59913	68904	64013	58303	63999	61109	61952	62537	57713
PWY-5097	L-lysine biosynthesis VI	58723	60147	54527	59776	55703	53798	63125	57727	64295	64084	55430	60635	58028	61499	59578	55377
PWY0-1297	superpathway of purine deoxyribonucleosides degradation	58641	65331	55999	62864	58376	58535	67548	60124	72331	62916	62268	66733	62897	61092	60752	60638
PEPTIDOGLYCANSYN-PWY	peptidoglycan biosynthesis I (meso-diaminopimelate containing)	58393	61312	55106	60610	56385	54541	64024	57907	65870	63466	56333	61624	59089	61103	60291	56219
PWY-6385	peptidoglycan biosynthesis III (mycobacteria)	58393	61312	55106	60610	56385	54541	64024	57907	65870	63466	56333	61624	59089	61103	60291	56219
PWY-6386	UDP-N-acetylmuramoyl-pentapeptide biosynthesis II (lysine-containing)	58280	60974	55087	60162	56213	54425	63636	57947	65563	63252	55999	61337	58748	60597	60256	55712
PWY-7221	guanosine ribonucleotides de novo biosynthesis	57913	59838	53771	59584	54908	53113	63444	58008	64572	63986	55352	60216	57488	60640	59553	54708
PWY-7663	gondoate biosynthesis (anaerobic)	57501	63120	57001	61634	58322	56128	63501	56217	67999	58780	57968	63730	61509	58817	61537	57555
PWY-5121	superpathway of geranylgeranyl diphosphate biosynthesis II (via MEP)	56987	60262	53946	59328	55095	53296	62892	57008	65172	61471	55010	60823	57993	59827	59338	55159
PWY-6163	chorismate biosynthesis from 3-dehydroquinate	56894	59094	53713	58825	54740	52752	61944	56160	63485	61669	54308	59617	57031	59351	59024	53980
CALVIN-PWY	Calvin-Benson-Bassham cycle	56093	58568	52325	56802	54203	53239	59192	52321	61311	58264	54457	59191	57028	55790	55466	54781
PWY-5973	cis-vaccenate biosynthesis	56015	61375	55520	59927	56841	54694	61700	54548	66065	57056	56238	61972	59903	57371	59946	55960
GLYCOCAT-PWY	glycogen degradation I (bacterial)	55954	52926	50938	55294	50094	48430	59803	57782	58713	62778	50529	54502	51268	57032	58080	46851
PWY-3001	superpathway of L-isoleucine biosynthesis I	55889	56707	53010	56698	53061	50931	60741	58099	62338	61693	52272	57704	54866	57136	59585	50143
DAPLYSINESYN-PWY	L-lysine biosynthesis I	54684	56942	50195	56284	51624	50435	60676	55419	62129	61011	53271	57786	54653	57747	55820	52730
ASPASN-PWY	superpathway of L-aspartate and L-asparagine biosynthesis	54578	61777	53870	58621	55531	54488	61695	55106	66719	56858	56617	62223	59497	55509	59279	56237
PWY-6122	5-aminoimidazole ribonucleotide biosynthesis II	54520	56457	51115	56093	52070	50397	58574	53161	59904	58811	51675	56487	54162	56216	55485	51487
PWY-6277	superpathway of 5-aminoimidazole ribonucleotide biosynthesis	54520	56457	51115	56093	52070	50397	58574	53161	59904	58811	51675	56487	54162	56216	55485	51487
PWY-6121	5-aminoimidazole ribonucleotide biosynthesis I	54264	56287	50898	55879	51897	50222	58467	53053	59820	58654	51552	56348	54052	56094	55442	51408
PWY-5104	L-isoleucine biosynthesis IV	54007	53498	51692	52820	51162	49196	57262	57160	59247	59242	49548	55034	51865	53021	58084	46287
PWY-6123	inosine-5'-phosphate biosynthesis I	53203	55614	50042	55032	51207	49515	58051	52594	59471	58007	51076	55765	53605	55607	54711	51077
GLYCOLYSIS	glycolysis I (from glucose 6-phosphate)	52974	42303	37548	42758	39428	41968	55455	57018	45895	66353	45069	42642	39268	54804	46598	42980
PWY-6317	galactose degradation I (Leloir pathway)	52868	54081	47758	54874	49171	47375	59354	53470	60026	59990	51032	54741	51392	57475	53579	49786
COA-PWY	coenzyme A biosynthesis I	52110	55576	50120	54584	51320	49705	56764	50663	59399	54429	50743	55756	53630	53851	54190	50725
PWY-5659	GDP-mannose biosynthesis	51994	55565	50704	56094	49798	47382	62252	61013	67087	58715	50261	57481	51819	57311	60024	46345
PWY-6737	starch degradation V	51440	47653	46411	50210	45361	43826	54327	52876	52579	58209	45522	48977	46113	52236	52971	42007
PWY-7199	pyrimidine deoxyribonucleosides salvage	51357	57496	49147	56425	51009	49327	62007	55892	65742	57814	53864	58861	55521	56838	56562	52727
PWY0-1298	superpathway of pyrimidine deoxyribonucleosides degradation	51222	56157	49047	54721	51012	50530	57892	51729	62353	53550	53084	57716	54759	53314	52996	52335
PWY-5101	L-isoleucine biosynthesis II	50902	49066	48388	49311	47413	45055	53270	53894	54330	56521	45297	50367	47525	49921	54887	41922
PWY-7111	pyruvate fermentation to isobutanol (engineered)	50152	48589	47238	48125	46798	45004	51886	51972	52897	55569	45060	49700	47197	48759	52699	42333
PWY-6151	S-adenosyl-L-methionine cycle I	49555	51057	44194	51795	45654	44980	55720	50491	56743	55751	48869	51834	48537	52538	49537	46629
ILEUSYN-PWY	L-isoleucine biosynthesis I (from threonine)	48895	47683	46469	47285	45884	43965	51243	51638	52567	54129	44250	49016	46313	47637	52334	41217
VALSYN-PWY	L-valine biosynthesis	48895	47683	46469	47285	45884	43965	51243	51638	52567	54129	44250	49016	46313	47637	52334	41217
PWY-5695	urate biosynthesis/inosine 5'-phosphate degradation	48200	54559	47013	53148	46571	46333	59072	55920	64617	53302	49840	56966	50486	50456	55629	45085
BRANCHED-CHAIN-AA-SYN-PWY	superpathway of branched amino acid biosynthesis	47561	45685	45123	46933	43875	41502	50428	50902	51385	52807	41912	46757	43808	47529	51923	38275
OANTIGEN-PWY	O-antigen building blocks biosynthesis (E. coli)	47285	49315	44098	48920	44416	43074	53245	50103	55412	52949	45779	50086	46409	49025	50464	43283
ANAEROFRUCAT-PWY	homolactic fermentation	46660	35343	31198	35702	33020	35860	47816	49745	38074	59785	38708	35593	32611	47747	39016	36812
1CMET2-PWY	N10-formyl-tetrahydrofolate biosynthesis	43732	45647	42676	45405	43108	41114	47230	43660	49747	45476	41547	46520	44648	44668	47627	41007
DTDPRHAMSYN-PWY	dTDP-L-rhamnose biosynthesis I	43123	45309	41921	47586	41929	38453	48331	42681	49760	45795	40591	45168	43188	47959	47640	40312
P164-PWY	purine nucleobases degradation I (anaerobic)	43079	51672	42771	44314	43721	44953	52007	50278	60247	47150	47872	54617	48368	40047	47935	43716
PWY-5484	glycolysis II (from fructose 6-phosphate)	42134	29296	25924	29951	27548	30490	42492	46577	31615	58039	33169	29427	26821	43530	33603	31276
PWY-7392	taxadiene biosynthesis (engineered)	41688	46127	40191	45244	40864	40223	49678	46092	52774	46955	42764	47561	44416	43851	46814	39777
PWY-5103	L-isoleucine biosynthesis III	41320	38709	39064	40306	37645	35338	43184	43977	43424	46095	35406	39573	37188	41149	45126	32225
PYRIDNUCSAL-PWY	NAD salvage pathway I	41133	39276	36704	41316	36550	35078	45797	43652	45566	47722	37931	40711	37150	43536	42789	34437
FOLSYN-PWY	superpathway of tetrahydrofolate biosynthesis and salvage	40686	43861	38830	42060	40404	39773	46819	44171	49400	46164	41938	45056	42794	41457	44463	39339
ARGSYNBSUB-PWY	L-arginine biosynthesis II (acetyl cycle)	39454	37985	37368	38371	36387	34556	41566	41766	42330	44147	35078	38934	36440	39116	42320	32582
ARGSYN-PWY	L-arginine biosynthesis I (via L-ornithine)	39388	38364	37381	38264	36685	35038	41517	41558	42491	43979	35475	39332	37020	38885	42079	33265
PWY-7400	L-arginine biosynthesis IV (archaebacteria)	39175	38134	37182	38057	36482	34828	41281	41339	42239	43743	35249	39092	36806	38679	41871	33043
PWY-5505	L-glutamate and L-glutamine biosynthesis	38693	39630	37548	40733	36756	35846	45053	44498	48120	42232	37810	41966	38048	39722	44452	32424
PWY-6897	thiamin salvage II	37284	37850	35938	35958	36101	35353	39521	40352	40963	42359	34908	38517	36939	36241	40086	33048
POLYISOPRENSYN-PWY	polyisoprenoid biosynthesis (E. coli)	37201	41860	36068	40886	36682	36426	45596	42853	48916	42793	39223	43476	40348	39022	42877	35397
RIBOSYN2-PWY	flavin biosynthesis I (bacteria and plants)	37117	40714	35736	37937	36861	37540	41427	40449	45428	40111	38453	41477	38853	34753	39445	34842
PWY-6612	superpathway of tetrahydrofolate biosynthesis	36382	39664	34908	37617	36536	36194	42689	40886	45532	41872	38492	41095	38869	36771	40568	35275
SER-GLYSYN-PWY	superpathway of L-serine and glycine biosynthesis I	36001	33624	34439	35453	33131	30594	36663	35882	35826	38833	29920	33933	32667	35456	38663	27731
GLCMANNANAUT-PWY	superpathway of N-acetylglucosamine, N-acetylmannosamine and N-acetylneuraminate degradation	35183	39725	33557	37009	35135	35228	42124	39361	46033	39471	38693	42061	38662	35499	39106	36196
PWY-6628	superpathway of L-phenylalanine biosynthesis	34943	39866	33482	32247	36383	37692	37288	35209	41479	37463	38185	41400	39840	29839	34610	39099
PWY-6630	superpathway of L-tyrosine biosynthesis	34835	39711	33367	32164	36223	37472	37172	35095	41344	37355	37981	41203	39603	29773	34539	38869
PWY-6353	purine nucleotides degradation II (aerobic)	34571	41077	33265	37980	35855	35542	40996	33923	44541	36832	38320	42078	40056	36677	37368	38486
PWY-5913	TCA cycle VI (obligate autotrophs)	34498	34886	30497	35163	30561	29857	42664	42433	43478	44157	34341	37387	33435	36992	38600	29594
PYRIDNUCSYN-PWY	NAD biosynthesis I (from aspartate)	34063	34363	33424	35086	32899	31524	36371	34289	37953	35030	31257	35351	33609	33650	36776	28872
FERMENTATION-PWY	mixed acid fermentation	33659	28501	29951	31405	28445	26835	30922	31886	22471	40491	23568	26944	26423	32956	33374	22122
PWY-6608	guanosine nucleotides degradation III	33579	40382	33621	36362	34415	35122	42086	40248	48285	36885	38361	43251	38701	34823	39495	36971
HISTSYN-PWY	L-histidine biosynthesis	33345	31149	31904	32893	30468	28264	35110	36110	35268	37761	28257	31821	29927	33773	36980	25530
COBALSYN-PWY	adenosylcobalamin salvage from cobinamide I	33238	37003	34720	34058	34491	33657	35876	35489	40595	32758	33036	37947	35836	30850	38368	31945
PWY-5384	sucrose degradation IV (sucrose phosphorylase)	33133	34303	29265	34900	29367	28773	42254	42076	43107	43685	33985	36286	32042	36879	38524	28483
PWY-7234	inosine-5'-phosphate biosynthesis III	32994	33392	27834	35371	30068	27785	37711	31130	35144	40361	31706	32666	32079	39070	31320	33275
SALVADEHYPOX-PWY	adenosine nucleotides degradation II	32805	39271	31737	36730	33848	33519	39461	32547	43170	34810	36248	40306	37815	35404	36110	36139
PWY-6269	adenosylcobalamin salvage from cobinamide II	32578	36346	34181	33440	34043	33117	35528	35115	40180	32362	32694	37503	35567	30544	37995	31653
PWY-5509	adenosylcobalamin biosynthesis from cobyrinate a,c-diamide I	32506	36261	34108	33353	33958	33047	35429	35046	40080	32279	32609	37409	35466	30445	37889	31557
TRPSYN-PWY	L-tryptophan biosynthesis	32417	33037	32811	34079	31401	28914	35684	36102	37836	35039	29248	33553	31636	32905	38572	26229
PANTOSYN-PWY	pantothenate and coenzyme A biosynthesis I	32071	36118	32039	34496	33230	32586	39184	37528	42947	36401	34299	37526	35127	33989	37600	30978
PWY490-3	nitrate reduction VI (assimilatory)	31658	38812	31789	34113	33185	34270	40916	40920	45949	36193	37267	41204	37425	31918	37945	34046
PWY-7539	6-hydroxymethyl-dihydropterin diphosphate biosynthesis III (Chlamydia)	31271	32802	28927	30469	30601	31149	35602	36063	38245	36046	32556	34330	32012	29818	33300	28552
P4-PWY	superpathway of L-lysine, L-threonine and L-methionine biosynthesis I	30845	9947	15746	21237	15654	14203	29712	32587	10434	40858	20516	9614	9886	32371	23749	14743
PWY-6147	6-hydroxymethyl-dihydropterin diphosphate biosynthesis I	30578	32287	28592	29871	30289	30827	35283	35445	37987	35599	32417	34083	31787	29564	33096	28320
PWY-5188	tetrapyrrole biosynthesis I (from glutamate)	30382	33822	30303	30720	30584	30953	33869	34059	38864	31805	30926	35095	32474	29186	34035	28872
GLUTORN-PWY	L-ornithine biosynthesis	30231	27496	28539	29466	26877	24717	31532	32612	31351	34180	25012	28104	26074	30491	33487	22352
PWY-7377	cob(II)yrinate a,c-diamide biosynthesis I (early cobalt insertion)	29465	33718	30162	30823	30435	30557	34126	33993	39140	30719	31367	35335	32435	28297	34019	29076
PWY-5189	tetrapyrrole biosynthesis II (from glycine)	29361	33847	29728	30259	30571	31118	33593	33562	38904	30458	31139	35093	32450	27858	33140	28785
PANTO-PWY	phosphopantothenate biosynthesis I	27878	33201	28117	29592	29685	29963	35310	34878	40028	32690	32110	34874	32543	28354	33456	29026
PWY-4984	urea cycle	27561	30769	27366	29717	27508	27099	33640	32715	36532	31076	29096	32728	30060	28880	31969	26806
PWY0-781	aspartate superpathway	27066	7500	12422	17266	12348	11137	25429	28823	7844	38200	16857	7225	7469	28596	19496	11634
PWY-6588	pyruvate fermentation to acetone	25649	31161	26447	30040	26315	25594	34451	32519	39137	28787	28745	33349	29440	28381	32692	25924
PWY-6876	isopropanol biosynthesis	25649	31161	26447	30041	26315	25594	34451	32519	39137	28787	28745	33349	29440	28381	32692	25924
PWY-6700	queuosine biosynthesis	25319	29773	25383	29152	25696	24983	33171	31517	36541	29968	28365	31406	28317	29211	31340	27488
METH-ACETATE-PWY	methanogenesis from acetate	24854	27491	23910	21402	26412	28715	23725	22515	26514	24453	26838	28951	28547	19887	21338	27792
PWY-7003	glycerol degradation to butanol	21927	25972	23626	20242	25587	25186	21539	18883	21502	20768	20929	26658	28205	18886	22608	27397
PWY-2941	L-lysine biosynthesis II	21873	25939	20932	19164	23874	25941	23660	23193	26181	26645	26631	26860	26649	16928	19668	26165
PWY0-1586	peptidoglycan maturation (meso-diaminopimelate containing)	21850	18710	19146	15132	17745	19119	16500	18151	20682	26185	19964	19807	19901	21499	20153	19795
PWY-5347	superpathway of L-methionine biosynthesis (transsulfuration)	21438	4921	8600	12302	8532	7647	19306	23266	5135	32986	12171	4729	4916	22489	14208	7985
PWY-6892	thiazole biosynthesis I (E. coli)	20883	21984	19970	17284	21598	23611	16716	16161	18912	17989	18766	21514	20828	15406	17194	19905
PWY-6471	peptidoglycan biosynthesis IV (Enterococcus faecium)	18608	12321	16228	14600	16067	15398	14717	13511	9103	17146	12910	12993	14783	15367	13447	12923
P441-PWY	superpathway of N-acetylneuraminate degradation	17614	6368	15074	1021	16377	16590	7828	4223	4413	11315	3717	6534	9983	19663	11305	4570
RHAMCAT-PWY	L-rhamnose degradation I	17378	20672	17696	20308	17477	17154	23332	22753	26710	19699	19368	22344	19432	18956	23076	16685
MET-SAM-PWY	superpathway of S-adenosyl-L-methionine biosynthesis	16470	3380	6059	8866	6011	5365	14494	17978	3521	27401	8823	3241	3379	17483	10281	5634
THISYN-PWY	superpathway of thiamin diphosphate biosynthesis I	15496	17164	14733	12610	16807	18353	14274	13715	16092	15110	16234	17532	17410	12033	13523	16782
P124-PWY	Bifidobacterium shunt	14793	3322	4591	8039	5005	5636	13573	16775	2417	28864	7615	2923	2859	16600	7260	4203
PWY0-1061	superpathway of L-alanine biosynthesis	14748	3191	6434	7785	5734	5535	11833	14330	2667	24282	7117	3759	3267	14836	11456	4424
ARGORNPROST-PWY	arginine, ornithine and proline interconversion	13903	15182	13025	10922	14332	15995	13106	12524	15102	13304	14999	16049	14928	9934	11316	15086
PWY-7187	pyrimidine deoxyribonucleotides de novo biosynthesis II	13333	4665	2581	6512	4840	4954	12035	15313	7877	24618	6333	2858	5304	17354	9142	4643
P42-PWY	incomplete reductive TCA cycle	13150	2625	3565	6956	4571	2811	11540	13800	1842	18282	4157	2492	3841	14443	9540	5156
POLYAMSYN-PWY	superpathway of polyamine biosynthesis I	12993	14492	14379	11338	14453	14369	11018	11159	12840	11379	12531	14276	14893	10421	14200	14116
PWY-6891	thiazole biosynthesis II (Bacillus)	12784	14245	12152	10179	13959	15571	11186	10686	12803	11871	13128	14420	14229	9523	10699	13968
GLUCONEO-PWY	gluconeogenesis I	12670	4975	11381	6900	12444	12377	8692	9888	3390	17382	10346	4179	10035	14386	9801	2848
PWY-6901	superpathway of glucose and xylose degradation	11698	2519	3290	6031	4182	4325	9621	12162	1383	20397	3038	2205	3450	14124	6328	3754
HSERMETANA-PWY	L-methionine biosynthesis III	11402	2196	4011	5885	3969	3527	9709	12308	2282	19281	5823	2105	2198	11976	6886	3689
HOMOSER-METSYN-PWY	L-methionine biosynthesis I	11030	2187	3965	5804	3925	3497	9548	12060	2277	18456	5771	2097	2188	11585	6791	3658
PWY-5022	4-aminobutanoate degradation V	10340	13068	10291	9253	11544	12782	11600	11203	13824	11206	13067	14121	13413	8226	11492	13099
HEXITOLDEGSUPER-PWY	superpathway of hexitol degradation (bacteria)	10168	3740	8789	5785	9659	9997	4538	2476	2587	6599	2195	3848	5912	10264	6460	2695
PWY-5005	biotin biosynthesis II	9060	11800	8957	7451	10720	12042	9531	9274	11605	9618	11755	12614	12600	6509	8696	12584
PWY-7456	mannan degradation	8538	6300	7587	6606	7441	7715	3217	3090	3047	4597	2278	4191	4489	6830	3393	2543
GLYCOLYSIS-E-D	superpathway of glycolysis and Entner-Doudoroff	8118	2326	3694	4261	4570	4944	3533	1997	1485	5532	1549	2252	3560	9237	4848	1881
PENTOSE-P-PWY	pentose phosphate pathway	7936	1861	1990	4047	2569	2864	6433	8484	1003	14569	2088	1559	2473	9457	4839	2494
HISDEG-PWY	L-histidine degradation I	7318	9503	7300	6123	8766	9785	7760	7446	9274	7727	9509	10124	10342	5321	6416	10177
P122-PWY	heterolactic fermentation	7234	1659	1912	3728	2353	2625	5975	7826	974	13601	2201	1413	1690	8402	4026	2155
P461-PWY	hexitol fermentation to lactate, formate, ethanol and acetate	6669	2077	6029	3571	6589	6568	2552	1312	1387	3768	1155	2137	3510	7679	3994	1441
PWY-7242	D-fructuronate degradation	6240	2099	4854	3999	4435	3791	2481	2080	1136	4027	3029	2810	1905	4144	4939	1699
PWY-6703	preQ0 biosynthesis	5955	3002	5175	4215	5358	5213	5306	6858	4756	7145	5411	3074	4031	4687	5355	2242
DENOVOPURINE2-PWY	superpathway of purine nucleotides de novo biosynthesis II	5527	6862	3619	5208	7075	7221	8523	14162	11292	8733	9150	4271	7743	4909	12853	3672
PWY-7254	TCA cycle VII (acetate-producers)	5346	4601	4773	4832	5124	5299	5216	4903	3354	5676	4313	4632	5131	5189	3986	4851
COLANSYN-PWY	colanic acid building blocks biosynthesis	5323	2086	5087	3797	4799	3913	2186	1512	818	269	1058	2479	2984	4564	3165	1565
GLUCUROCAT-PWY	superpathway of &beta;-D-glucuronide and D-glucuronate degradation	4958	1689	3671	3153	3413	2934	1873	1529	890	2869	2115	2125	1636	2962	3602	1227
PWY-7323	superpathway of GDP-mannose-derived O-antigen building blocks biosynthesis	4702	1910	4378	3362	4140	3407	1867	1313	772	2305	954	2217	2580	3907	2626	1427
GALACTUROCAT-PWY	D-galacturonate degradation I	4338	1724	2904	3053	3051	2099	1847	1737	1160	2401	2462	2291	2645	1845	3303	1374
PWY-841	superpathway of purine nucleotides de novo biosynthesis I	4095	5118	2659	3844	5308	5439	6388	11082	8605	6543	6938	3139	5816	3612	9968	2692
PWY0-166	superpathway of pyrimidine deoxyribonucleotides de novo biosynthesis (E. coli)	3731	4667	2422	3505	4842	4957	5840	10172	7880	5977	6338	2859	5307	3295	9143	2451
GALACT-GLUCUROCAT-PWY	superpathway of hexuronide and hexuronate degradation	3681	1359	2537	2461	2508	1839	1488	1338	817	2060	1868	1796	1635	1707	2807	1061
PWY0-162	superpathway of pyrimidine ribonucleotides de novo biosynthesis	3399	4255	2197	3186	4424	4533	5331	9420	7218	5468	5810	2593	4849	2992	8433	2222
TCA-GLYOX-BYPASS	superpathway of glyoxylate bypass and TCA	3031	115	178	155	120	172	182	224	194	228	184	209	124	138	1523	149
PWY-6507	4-deoxy-L-threo-hex-4-enopyranuronate degradation	2928	1187	1861	2320	1072	1096	1216	1278	688	1443	1950	1429	764	853	1418	920
PWY-6470	peptidoglycan biosynthesis V (&beta;-lactam resistance)	2729	2196	1803	2825	3060	3375	4568	5529	1523	9478	5444	504	3125	886	1752	353
PWY-6125	superpathway of guanosine nucleotides de novo biosynthesis II	2685	3377	1727	2514	3517	3613	4247	7690	5805	4354	4661	2042	3862	2357	6825	1748
PWY-7200	superpathway of pyrimidine deoxyribonucleoside salvage	2657	3340	1715	2493	3471	3563	4192	7481	5711	4288	4585	2028	3813	2339	6662	1737
P23-PWY	reductive TCA cycle I	2574	1519	1477	2182	2873	2000	2956	1639	1010	4647	1303	1012	2814	1364	3667	803
SULFATE-CYS-PWY	superpathway of sulfate assimilation and cysteine biosynthesis	2564	734	2266	1250	2608	2324	897	369	347	1355	324	773	972	2909	2392	480
PWY-7196	superpathway of pyrimidine ribonucleosides salvage	2482	3123	1597	2324	3255	3342	3926	7109	5373	4018	4311	1887	3573	2178	6325	1615
TCA	TCA cycle I (prokaryotic)	2315	1459	1295	2040	2531	1736	3383	4248	953	8126	2617	923	2620	1192	3567	749
PWY-7228	superpathway of guanosine nucleotides de novo biosynthesis I	2311	2908	1485	2162	3032	3115	3661	6663	5012	3756	4023	1755	3330	2028	5907	1502
PWY-6969	TCA cycle V (2-oxoglutarate:ferredoxin oxidoreductase)	2030	1550	1252	1880	2641	1906	3060	3835	988	7402	2800	896	2893	1013	3372	656
FUCCAT-PWY	fucose degradation	1771	659	1718	1057	1552	1446	616	389	254	1002	625	779	825	1460	2116	519
PWY-7184	pyrimidine deoxyribonucleotides de novo biosynthesis I	1746	2202	1119	1633	2299	2362	2777	5107	3816	2848	3060	1324	2526	1531	4518	1133
PWY-6545	pyrimidine deoxyribonucleotides de novo biosynthesis III	1711	2160	1106	1595	2249	2319	2686	4806	3681	2755	2978	1309	2475	1493	4254	1123
PWY0-1261	anhydromuropeptides recycling	1556	1615	951	1108	4450	908	1451	1051	804	738	1198	1960	6882	1317	8520	1273
PWY-7197	pyrimidine deoxyribonucleotide phosphorylation	1555	1961	996	1454	2048	2105	2471	4550	3398	2534	2725	1177	2249	1362	4026	1008
PWY-7211	superpathway of pyrimidine deoxyribonucleotides de novo biosynthesis	1447	946	1424	1267	1770	1602	979	638	405	1427	641	1133	2397	1529	3547	568
PRPP-PWY	superpathway of histidine, purine, and pyrimidine biosynthesis	1344	1508	816	935	3217	740	1312	841	761	699	318	1571	4361	1130	6172	1063
P108-PWY	pyruvate fermentation to propanoate I	1258	1101	821	1208	1917	1402	2038	2529	720	4711	2432	603	2369	612	2233	417
LACTOSECAT-PWY	lactose and galactose degradation I	1238	998	721	1287	1453	1679	2229	3082	685	5605	3335	1682	1502	392	824	149
POLYAMINSYN3-PWY	superpathway of polyamine biosynthesis II	1225	1038	1639	1105	2141	1375	1076	312	425	830	444	1078	1355	1676	2022	713
PWY-7431	aromatic biogenic amine degradation (bacteria)	1210	300	1102	566	1201	1150	393	128	105	603	180	271	327	1431	288	157
ASSIM-PWY	sulfate reduction I (assimilatory)	1202	336	1069	574	1248	1109	408	165	158	616	146	355	448	1378	1135	218
PWY0-862	(5Z)-dodec-5-enoate biosynthesis	1149	787	573	1054	1163	1372	1832	2713	571	5424	2679	228	1213	296	2239	157
PWY-7315	dTDP-N-acetylthomosamine biosynthesis	1122	375	1016	802	857	713	389	369	173	701	442	644	621	791	2851	349
FASYN-ELONG-PWY	fatty acid elongation -- saturated	1078	784	865	711	1837	825	751	534	728	804	589	1019	2328	887	2951	805
ARG???SYN	superpathway of arginine and polyamine biosynthesis	1030	822	546	553	2152	543	702	651	486	592	388	1031	3270	760	6132	704
PWY-6396	superpathway of 2,3-butanediol biosynthesis	967	547	681	896	690	581	522	556	322	930	651	288	531	900	839	541
PWY-6590	superpathway of Clostridium acetobutylicum acidogenic fermentation	870	662	544	516	1571	457	672	534	518	506	357	936	2428	584	5101	606
PWY-7210	pyrimidine deoxyribonucleotides biosynthesis from CTP	820	529	996	710	997	902	547	356	158	800	358	649	733	935	2023	292
PWY-6629	superpathway of L-tryptophan biosynthesis	807	103	147	199	155	333	55	503	294	397	159	456	155	107	6115	270
PWY-5345	superpathway of L-methionine biosynthesis (by sulfhydrylation)	800	400	336	318	1260	512	365	319	290	485	267	436	1000	405	2192	315
PWY0-1479	tRNA processing	761	95	137	192	143	277	55	488	225	392	151	324	124	107	3429	252
PWY-7198	pyrimidine deoxyribonucleotides de novo biosynthesis IV	717	414	822	616	863	759	419	257	113	640	264	565	588	801	1759	231
P105-PWY	TCA cycle IV (2-oxoglutarate decarboxylase)	688	365	448	435	444	485	525	540	420	669	480	440	471	363	2063	315
CENTFERM-PWY	pyruvate fermentation to butanoate	679	516	424	402	1229	356	524	416	404	394	278	730	1905	455	4037	472
PWY-5910	superpathway of geranylgeranyldiphosphate biosynthesis I (via mevalonate)	671	524	383	693	785	899	1229	1762	353	3654	1792	87	796	196	412	69
FUC-RHAMCAT-PWY	superpathway of fucose and rhamnose degradation	659	541	426	450	1212	357	483	294	224	334	145	628	1153	555	2130	431
GLYCOLYSIS-TCA-GLYOX-BYPASS	superpathway of glycolysis, pyruvate dehydrogenase, TCA, and glyoxylate bypass	593	224	351	305	239	339	352	416	366	444	343	400	245	273	2589	284
TEICHOICACID-PWY	teichoic acid (poly-glycerol) biosynthesis	562	358	989	572	745	591	296	157	100	533	106	431	452	785	1584	145
PWY-7013	L-1,2-propanediol degradation	550	95	161	597	233	83	137	317	131	125	149	347	209	107	71	395
PWY-5304	superpathway of sulfur oxidation (Acidianus ambivalens)	527	447	986	498	976	891	538	155	172	517	214	386	468	1072	1330	219
PWY0-41	allantoin degradation IV (anaerobic)	525	641	302	413	577	750	331	279	136	489	390	193	529	181	405	110
P125-PWY	superpathway of (R,R)-butanediol biosynthesis	509	499	632	557	548	659	224	231	259	380	325	316	481	450	539	361
PWY-1861	formaldehyde assimilation II (RuMP Cycle)	497	71	115	123	287	1396	187	127	159	187	199	203	139	211	565	481
PWY-922	mevalonate pathway I	472	368	268	487	552	632	865	1246	247	2607	1268	60	560	137	289	48
PWY-5705	allantoin degradation to glyoxylate III	462	559	332	367	510	660	295	257	127	430	378	212	462	248	485	104
P163-PWY	L-lysine fermentation to acetate and butanoate	459	507	518	459	573	875	424	348	155	466	541	127	597	171	258	111
REDCITCYC	TCA cycle VIII (helicobacter)	414	875	662	564	2100	319	953	244	447	324	363	884	3039	773	1937	608
PWY-5840	superpathway of menaquinol-7 biosynthesis	392	175	242	221	198	206	297	264	218	273	213	274	206	224	1646	230
PWY-7237	myo-, chiro- and scillo-inositol degradation	386	381	470	417	419	507	87	112	162	218	116	225	361	326	404	265
PWY-3781	aerobic respiration I (cytochrome c)	385	534	661	489	865	348	824	319	529	447	545	579	1194	599	406	451
PWY-5918	superpathay of heme biosynthesis from glutamate	359	392	285	244	1064	180	362	194	237	188	213	487	1689	309	2043	305
RUMP-PWY	formaldehyde oxidation I	359	52	83	91	200	789	138	94	108	139	140	140	100	156	393	319
PWY-5897	superpathway of menaquinol-11 biosynthesis	345	155	215	195	175	183	261	231	196	239	188	247	183	197	1498	203
PWY-5898	superpathway of menaquinol-12 biosynthesis	345	155	215	195	175	183	261	231	196	239	188	247	183	197	1498	203
PWY-5899	superpathway of menaquinol-13 biosynthesis	345	155	215	195	175	183	261	231	196	239	188	247	183	197	1498	203
PWY-5838	superpathway of menaquinol-8 biosynthesis I	337	164	206	194	193	171	261	210	174	202	120	253	203	202	1489	206
PWY-5971	palmitate biosynthesis II (bacteria and plants)	333	43	61	82	64	138	23	209	121	165	66	182	64	44	2515	110
PWY-6478	GDP-D-glycero-&alpha;-D-manno-heptose biosynthesis	325	125	161	218	109	97	124	118	107	108	103	221	106	87	497	173
ENTBACSYN-PWY	enterobactin biosynthesis	324	45	63	84	68	136	24	201	122	161	67	192	68	46	2533	114
PWY-5154	L-arginine biosynthesis III (via N-acetyl-L-citrulline)	301	307	202	206	843	181	263	162	176	165	125	388	1329	286	1593	262
PWY-5845	superpathway of menaquinol-9 biosynthesis	300	70	97	115	96	141	48	194	135	180	97	190	98	77	1466	138
PWY-5850	superpathway of menaquinol-6 biosynthesis I	300	70	97	115	96	141	48	194	135	180	97	190	98	77	1466	138
PWY-5896	superpathway of menaquinol-10 biosynthesis	300	70	97	115	96	14	48	194	135	180	97	190	98	77	1466	138
PWY-7664	oleate biosynthesis IV (anaerobic)	300	40	56	76	59	127	21	194	110	154	61	152	59	40	2083	92
FAO-PWY	fatty acid &beta;-oxidation I	294	222	182	173	535	153	226	179	173	169	119	3155	833	196	1820	203
GLYOXYLATE-BYPASS	glyoxylate cycle	275	87	131	124	98	152	126	206	156	199	141	174	101	99	1223	117
HEMESYN2-PWY	heme biosynthesis II (anaerobic)	255	278	218	197	681	148	290	154	182	159	132	342	1072	242	1285	225
PWY-6895	superpathway of thiamin diphosphate biosynthesis II	251	274	150	163	788	119	222	130	118	110	77	343	1267	208	1539	210
PWYG-321	mycolate biosynthesis	247	31	44	60	47	101	16	153	89	121	48	138	47	32	1997	82
BIOTIN-BIOSYNTHESIS-PWY	biotin biosynthesis I	237	30	43	58	45	97	16	147	86	116	46	133	45	31	1861	79
ALL-CHORISMATE-PWY	superpathway of chorismate metabolism	236	51	69	84	72	113	31	146	109	129	64	166	73	53	1458	105
PWY-7328	superpathway of UDP-glucose-derived O-antigen building blocks biosynthesis	229	39	67	249	97	69	57	132	61	83	62	144	87	44	1408	164
PWY-5861	superpathway of demethylmenaquinol-8 biosynthesis	226	109	138	129	129	114	174	140	116	135	80	169	136	135	1010	138
PWY-5989	stearate biosynthesis II (bacteria and plants)	204	26	36	49	38	83	14	126	73	99	39	114	38	26	1676	67
PWY-6282	palmitoleate biosynthesis I (from (5Z)-dodec-5-enoate)	204	26	36	49	38	83	14	126	73	99	39	114	38	26	1683	67
PWY0-845	superpathway of pyridoxal 5'-phosphate biosynthesis and salvage	202	106	91	106	199	93	66	107	91	90	38	229	222	96	1308	139
PWY-5860	superpathway of demethylmenaquinol-6 biosynthesis I	200	46	65	76	64	94	32	130	90	120	65	127	65	52	994	92
PWY-5862	superpathway of demethylmenaquinol-9 biosynthesis	200	46	65	76	64	94	32	130	90	120	65	127	65	52	994	92
NAD-BIOSYNTHESIS-II	NAD salvage pathway II	195	81	98	111	129	121	47	138	93	126	62	176	81	113	1168	126
PWY-6519	8-amino-7-oxononanoate biosynthesis I	187	23	33	45	35	76	12	116	67	91	36	105	35	24	1518	62
FASYN-INITIAL-PWY	superpathway of fatty acid biosynthesis initiation (E. coli)	170	21	30	41	32	69	11	105	61	83	33	95	32	22	1409	56
PPGPPMET-PWY	ppGpp biosynthesis	170	21	30	41	32	69	11	105	61	83	33	95	32	22	1413	56
PWY-5855	ubiquinol-7 biosynthesis (prokaryotic)	167	21	30	41	32	69	1163	103	60	81	33	94	32	22	1152	55
PWY-5856	ubiquinol-9 biosynthesis (prokaryotic)	167	21	30	41	32	69	11	103	60	81	33	94	32	22	1152	55
PWY-5857	ubiquinol-10 biosynthesis (prokaryotic)	167	21	30	41	32	69	11	103	60	81	33	94	32	22	1152	55
PWY-6708	ubiquinol-8 biosynthesis (prokaryotic)	167	21	30	41	32	69	11	103	60	81	33	94	32	22	1152	55
PWY-5177	glutaryl-CoA degradation	161	75	64	153	236	99	61	17	24	59	68	81	77	31	37	22
ARGDEG-PWY	superpathway of L-arginine, putrescine, and 4-aminobutanoate degradation	145	19	28	37	30	62	10	87	54	72	29	84	30	20	1030	50
ORNARGDEG-PWY	superpathway of L-arginine and L-ornithine degradation	145	19	28	37	30	62	10	87	54	72	29	84	30	20	1030	50
HEME-BIOSYNTHESIS-II	heme biosynthesis I (aerobic)	144	158	114	98	434	72	145	78	95	75	85	196	698	124	848	123
UBISYN-PWY	superpathway of ubiquinol-8 biosynthesis (prokaryotic)	142	20	28	37	30	59	11	86	53	68	27	86	30	21	1000	50
PWY-1269	CMP-3-deoxy-D-manno-octulosonate biosynthesis I	140	130	78	76	337	88	98	69	60	85	32	172	610	100	911	110
GLUCOSE1PMETAB-PWY	glucose and glucose-1-phosphate degradation	136	17	24	33	25	55	9	84	49	66	26	76	25	17	1135	45
ORNDEG-PWY	superpathway of ornithine degradation	136	17	24	33	25	55	9	84	49	66	26	76	25	17	1112	45
PWY-5863	superpathway of phylloquinol biosynthesis	136	67	93	78	72	81	102	90	95	92	78	117	76	76	776	83
PWY0-1415	superpathway of heme biosynthesis from uroporphyrinogen-III	127	99	108	91	79	56	151	75	87	77	44	114	89	93	899	79
PYRIDOXSYN-PWY	pyridoxal 5'-phosphate biosynthesis I	121	53	49	59	94	55	32	65	54	54	23	129	101	49	807	78
PWY0-1533	methylphosphonate degradation I	120	15	21	29	23	49	8	74	43	59	23	67	23	15	968	40
PWY-5837	1,4-dihydroxy-2-naphthoate biosynthesis I	119	59	81	68	63	70	90	79	83	81	68	103	67	66	681	72
ECASYN-PWY	enterobacterial common antigen biosynthesis	116	14	21	28	22	47	8	71	41	570	22	65	22	15	929	38
GLYCOL-GLYOXDEG-PWY	superpathway of glycol metabolism and degradation	112	15	22	29	23	47	9	70	43	57	24	64	23	16	874	39
KDO-NAGLIPASYN-PWY	superpathway of (Kdo)2-lipid A biosynthesis	110	46	44	53	82	48	28	59	47	50	21	112	89	44	706	70
PWY-5920	superpathway of heme biosynthesis from glycine	104	133	144	122	106	75	202	93	116	102	59	152	119	124	130	105
NAGLIPASYN-PWY	lipid IVA biosynthesis	101	110	60	65	321	48	89	52	47	44	19	138	522	84	641	84
PWY-6467	Kdo transfer to lipid IVA III (Chlamydia)	101	110	60	65	321	48	89	52	47	44	19	138	522	84	641	84
PWY0-1241	ADP-L-glycero-&beta;-D-manno-heptose biosynthesis	100	13	19	26	20	39	7	57	35	46	20	57	20	14	634	34
GLUCARDEG-PWY	D-glucarate degradation I	90	11	16	22	17	37	6	56	32	44	17	51	17	11	754	30
METHGLYUT-PWY	superpathway of methylglyoxal degradation	85	10	15	20	162	34	5	52	30	41	16	47	16	11	711	28
PWY0-1338	polymyxin resistance	82	10	15	20	16	34	5	50	28	40	16	46	16	11	650	27
PWY-7094	fatty acid salvage	71	73	105	78	70	63	123	62	95	81	88	88	75	88	67	71
AST-PWY	L-arginine degradation II (AST pathway)	68	8	12	16	13	28	4	42	24	33	13	38	13	9	571	22
TYRFUMCAT-PWY	L-tyrosine degradation I	41	127	59	61	381	24	105	12	28	13	7	124	627	93	87	77
PWY-7527	L-methionine salvage cycle III	39	25	41	33	41	49	31	25	44	43	59	35	41	60	21	41
PWY-5677	succinate fermentation to butanoate	35	19	25	42	39	52	45	69	30	26	173	13	21	34	69	22
GOLPDLCAT-PWY	superpathway of glycerol degradation to 1,3-propanediol	23	13	16	28	26	35	30	47	20	17	134	8	14	22	46	15
PWY-4361	S-methyl-5-thio-&alpha;-D-ribose 1-phosphate degradation	23	15	25	20	25	29	19	15	27	26	37	21	25	37	13	25
